# Supplementary material for: LncRNA SNHG3 promotes cell growth by sponging miR-196a-5p and indicates the poor survival in osteosarcoma
Source: PubMed Central journal article supplement — Int J Immunopathol Pharmacol. 2019 Jan 9;33:2058738418820743. doi: 10.1177/2058738418820743 (PMC6329016; doi:10.1177/2058738418820743), 2019-01-09
Supplement: Supplementary_data_(2).pdf [file Supplementary_data_%282%29.pdf]

**Supplementary Figure S1.** The transfection efficiency of miR-196a-5p inhibitor or mimic in U2-OS or MG-63 cell line was determined by qPCR analysis. Data were the means  $\pm$  SEM of three experiments. \*\*  $P < 0.01$ .

## Supplementary Tables

**Table S1** The clinicopathologic data of OS patients

| Variables                 | Number of cases (%) |
|---------------------------|---------------------|
|                           | 126 (100%)          |
| <i>Age (years)</i>        |                     |
| $\geq 18$                 | 69 (57.02%)         |
| $< 18$                    | 57 (42.98%)         |
| <i>Gender</i>             |                     |
| Male                      | 50 (39.68%)         |
| Female                    | 76 (60.32%)         |
| <i>Tumor size(cm)</i>     |                     |
| $>5$                      | 104 (82.54%)        |
| $\leq 5$                  | 22 (17.46%)         |
| <i>Distant metastases</i> |                     |
| No                        | 101 (80.16%)        |
| Yes                       | 25 (19.84%)         |

**Table S2.** List of primers

| Gene        | Sense (F)                 | Anti-sense (R)              |
|-------------|---------------------------|-----------------------------|
| SNHG3       | 5' TTCAAGCGATTCTCGTGCC3'  | 5' AAGATTGTCAAACCCTCCCTGT3' |
| GAPDH       | 5'TTGCTTCAGGGTTTCATCCAG3' | 5'GACACTCGCTCAGCTTCTTG3'    |
| miR-196a-5p | 5' TAGGTAGTTTCATGTTGTTG3' | 5' ACCTGCGTAGGTAGTTTCATGT3' |
| U6          | 5'CCCTGGCACCCAGCAC3'      | 5'GCCGATCCACACGGAGTAC3'     |

**Table S3** The association of SNHG3 expression with clinicopathological characteristics in OS patients

| Variables                 | Cases<br>(n) | SNHG3 |     | <i>P</i> value |
|---------------------------|--------------|-------|-----|----------------|
|                           |              | High  | Low |                |
|                           | 126          | 24    | 102 |                |
| <i>Age (years)</i>        |              |       |     |                |
| ≥ 18                      | 69           | 15    | 54  | 0.496          |
| < 18                      | 57           | 9     | 48  |                |
| <i>Gender</i>             |              |       |     |                |
| Male                      | 50           | 10    | 40  | 0.821          |
| Female                    | 76           | 14    | 62  |                |
| <i>Tumor size(cm)</i>     |              |       |     |                |
| > 5                       | 104          | 15    | 89  | 0.004          |
| ≤ 5                       | 22           | 9     | 13  |                |
| <i>Distant metastases</i> |              |       |     |                |
| No                        | 101          | 18    | 83  | 0.570          |
| Yes                       | 25           | 6     | 19  |                |

**Table S4** Cox regression analysis of SNHG3 expression as survival predictor in OS patients

| Variables                 | Univariate Cox regression analysis |                | Multivariate Cox regression analysis |                |
|---------------------------|------------------------------------|----------------|--------------------------------------|----------------|
|                           | RR (95% CI)                        | <i>P</i> value | RR (95% CI)                          | <i>P</i> value |
| <i>Age (years)</i>        |                                    |                |                                      |                |
| ≥ 18 vs. < 18             | 1.460 (0.644 to 3.313)             | 0.365          | NA                                   | NA             |
| <i>Gender</i>             |                                    |                |                                      |                |
| Male vs. Female           | 0.775 (0.333 to 1.802)             | 0.553          | NA                                   | NA             |
| <i>Tumor size(cm)</i>     |                                    |                |                                      |                |
| > 5 vs. ≤ 5               | 4.176 (0.563 to 30.991)            | 0.162          | NA                                   | NA             |
| <i>Distant metastases</i> |                                    |                |                                      |                |
| Yes vs. No                | 1.746 (0.750 to 4.066)             | 0.196          | 1.798 (0.768 to 4.207)               | 0.176          |
| <i>SNHG3 expression</i>   |                                    |                |                                      |                |
| High vs. Low              | 4.568 (2.079 to 10.035)            | <0.0001        | 4.611 (2.099 to 10.130)              | <0.0001        |

NA: not analyzed

**Table S5** SNHG3 specific binding with miRNAs

| <b>name</b>     | <b>mirAccession</b> | <b>geneName</b> | <b>targetsites</b> | <b>biocomplex</b> |
|-----------------|---------------------|-----------------|--------------------|-------------------|
| hsa-miR-196a-5p | MIMAT00002<br>26    | SNHG3           | <b>1</b>           | 9                 |
| hsa-miR-186-5p  | MIMAT00004<br>56    | SNHG3           | <b>1</b>           | 4                 |
| hsa-miR-384     | MIMAT00010<br>75    | SNHG3           | <b>1</b>           | 3                 |

**Table S6** The association of miR-196a-5p expression with clinicopathologic characteristics in OS patients

| Variables                 | Cases<br>(n) | miR-196a-5p |     | <i>P</i> value |
|---------------------------|--------------|-------------|-----|----------------|
|                           |              | High        | Low |                |
| Total                     | 123          | 33          | 90  |                |
| <i>Age (years)</i>        |              |             |     |                |
| ≥ 18                      | 67           | 14          | 53  | 0.152          |
| < 18                      | 56           | 19          | 37  |                |
| <i>Gender</i>             |              |             |     |                |
| Male                      | 50           | 11          | 39  | 0.408          |
| Female                    | 73           | 22          | 51  |                |
| <i>Tumor size(cm)</i>     |              |             |     |                |
| ≥ 5                       | 102          | 30          | 72  | 0.186          |
| < 5                       | 21           | 3           | 18  |                |
| <i>Distant metastases</i> |              |             |     |                |
| No                        | 98           | 24          | 74  | 0.312          |
| Yes                       | 25           | 9           | 16  |                |

**Table S7** Cox regression analysis of miR-196a-5p expression as survival predictor

| Variables                     | Univariate Cox regression analysis |                | Multivariate Cox regression analysis |                |
|-------------------------------|------------------------------------|----------------|--------------------------------------|----------------|
|                               | RR (95% CI)                        | <i>P</i> value | RR (95% CI)                          | <i>P</i> value |
| <i>Age (years)</i>            |                                    |                |                                      |                |
| ≥ 18 vs. < 18                 | 1.369 (0.597 to 3.136)             | 0.458          | NA                                   | NA             |
| <i>Gender</i>                 |                                    |                |                                      |                |
| Male vs. Female               | 0.799 (0.340 to 1.875)             | 0.606          | NA                                   | NA             |
| <i>Tumor size(cm)</i>         |                                    |                |                                      |                |
| ≤5 vs. >5                     | 3.787 (0.509 to 28.167)            | 0.193          | NA                                   | NA             |
| <i>Distant metastases</i>     |                                    |                |                                      |                |
| No vs. Yes                    | 1.797 (0.765 to 4.220)             | 0.179          | 1.768 (0.754 to 4.145)               | 0.190          |
| <i>miR-196a-5p expression</i> |                                    |                |                                      |                |
| High vs. Low                  | 2.238 (0.990 to 5.056)             | 0.053          | 2.214 (0.981 to 4.995)               | 0.056          |

NA: not analyzed
