# Supplementary figures and images for: LncRNA SNHG3 promotes cell growth by sponging miR-196a-5p and indicates the poor survival in osteosarcoma
Source: PubMed Central journal article supplement — Int J Immunopathol Pharmacol. 2019 Jan 9;33:2058738418820743. doi: 10.1177/2058738418820743 (PMC6329016; doi:10.1177/2058738418820743), 2019-01-09

miR-196a-5p expression

14  
12  
10  
8  
1.0  
0.8  
0.6  
0.4  
0.2  
0.0

U-20S

MG-63

- NC
- miR-196a-5p inhibitor
- miR-NC
- miR-196a-5p mimic

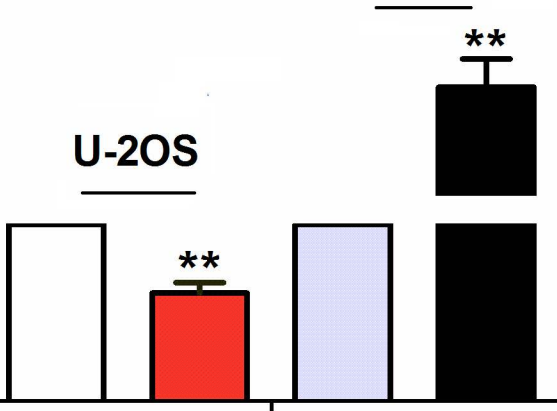

Supplement: Supplementary_Figure_S1_(1).pdf [file Supplementary_Figure_S1_%281%29.pdf]
